# Supplementary material for: SHP-2 and canonical PD-1: SHP-2 axis regulate myeloid cell differentiation, anti-tumor responses and innate immune memory
Source: Research Square preprint supplement (doi:10.21203/rs.3.rs-1198158/v1), 2022-01-07
Supplement: Supplementary file 1 [file db0c14c5068c1f6eb6baf0c2.xlsx]

## Sheet: Fig. 5(O)
BubblePlot_ID	ID	Description	GeneRatio	BgRatio	pvalue	p.adjust	qvalue	geneID	Count
Macrophage Migration	GO:1905517	macrophage migration	10/492	49/13129	1.09864e-05	0.000238798	0.000168346	Cd200/C3ar1/Ccl3/Ednrb/Thbs1/P2rx4/C5ar1/Cd200r1/Ccl2/Cmklr1	10
Autophagy	GO_POSITIVE_REGULATION_OF_AUTOPHAGY	GO_POSITIVE_REGULATION_OF_AUTOPHAGY	10/481	104/12316	0.00737458	0.0501207	0.0381628	Plk2/Adrb2/Ikbke/Hif1a/Bnip3/Flcn/Pim1/Mitf/Sirt2/Trp53inp2	10
Myeloid Cell Differentiation	GO:0030099	myeloid cell differentiation	45/492	348/13129	2.74952e-13	7.25498e-11	5.11454e-11	Klf2/Jun/Nfatc1/Tfrc/Mafb/Dcstamp/Trf/Fos/Ocstamp/Zfp36/Ptpn11/Cd4/Zfp36l1/Slc9b2/Scin/Rassf2/Gpr171/Cebpa/Ccl3/Cd109/Tjp2/Csf3r/Actn1/App/C1qc/Itgam/Src/Oscar/Irf8/Hif1a/Vegfa/Pf4/Pirb/Id2/Pabpc4/Fasn/Car2/Dab2/Itgb3/Cebpb/Junb/Tnfsf9/Mitf/Sfxn1/Cd300lf	45
TLR Signaling	GO:0002224	toll-like receptor signaling pathway	17/492	96/13129	8.67233e-08	4.14026e-06	2.91876e-06	Tlr8/Tlr7/Wdfy1/Unc93b1/Tnfaip3/Tlr4/Cd300a/Cd36/Hspd1/Tlr1/Pik3ap1/Appl2/Arrb2/Rftn1/Ptpn22/Irak3/Cd300lf	17
NFkB Targets	MANTOVANI_NFKB_TARGETS_UP	MANTOVANI_NFKB_TARGETS_UP	15/501	62/13392	5.87531e-09	3.21128e-07	2.08331e-07	Vcam1/Nfkbiz/Cxcl3/Spp1/Saa3/Cxcl2/Dusp6/Pld4/Ccl8/Vegfa/C3/Car2/Ccl7/Ccl2/Atp8a1	15
Activation	GO:0002274	myeloid leukocyte activation	29/492	182/13129	3.49048e-11	4.78554e-09	3.37366e-09	Jun/Hmox1/Dcstamp/Tlr8/Il4ra/Tlr7/Cd200/Cebpa/C1qa/Fcgr3/Fcgr4/Thbs1/Mmp8/Cd84/App/Itgam/Tlr4/Ptafr/Pirb/Cd300a/Hspd1/C5ar1/Clec4d/Tlr1/Ctsc/Adam9/Tnfsf9/Ndrg1/Cd300lf	29
Antigen Presentation	GO:0019882	antigen processing and presentation	10/492	83/13129	0.00104233	0.0100784	0.00710496	Fcgr2b/March1/Fcgr3/Fgl2/Unc93b1/Thbs1/Hfe/Kdm5d/Ctss/Rftn1	10
Phagocytosis	GO:0006909	phagocytosis	23/492	180/13129	2.62523e-07	1.13203e-05	7.98044e-06	Fcgr2b/Pld4/Fcgr3/Itgav/Thbs1/Gas6/Tlr4/Cnn2/Irf8/Pecam1/Cd300a/Mertk/C3/Cd36/Itgb3/Ccl2/Abca1/Il2rb/Bin2/P2rx7/Appl2/Cd300lf/Hck	23
Chemokine Activity	GO:0008009	chemokine activity	10/487	30/13041	7.3746e-08	3.14158e-05	2.6238e-05	Ppbp/Cxcl3/Ccl6/Ccl4/Cxcl2/Ccl3/Ccl8/Pf4/Ccl7/Ccl2	10
Cytokine Activity	GO:0005125	cytokine activity	18/487	115/13041	2.42043e-07	5.15552e-05	4.30582e-05	Ppbp/Cxcl3/Spp1/Ccl6/Ccl4/Cxcl2/Ccl3/Ccl8/Vegfa/Pf4/Areg/Il1a/Osm/Ccl7/Gdf15/Ccl2/Tnfsf9/Tnfsf14	18
Cell Killing	GO:0001906	cell killing	13/492	127/13129	0.000948245	0.00943058	0.00664828	Arg1/Nos2/Ccr5/Lamp1/Fcgr3/Ctsh/Pf4/C3/Hsp90ab1/Ctsc/Ccl2/P2rx7/Arrb2	13
Cellular Response to IL-1	GO:0071347	cellular response to interleukin-1	11/492	65/13129	2.61973e-05	0.000503875	0.000355216	Egr1/Saa3/Ccl6/Ccl4/Ccl3/Ccl8/Il1a/Ccl7/Cebpb/Ccl2/Irak3	11
Classical M1 vs. Alternative M2 Macrophage Activation (UP-regulation)	GSE5099_CLASSICAL_M1_VS_ALTERNATIVE_M2_MACROPHAGE_UP	GSE5099_CLASSICAL_M1_VS_ALTERNATIVE_M2_MACROPHAGE_UP	18/500	282/13381	0.0191997	0.0517839	0.029006	Il4ra/Rassf2/Maf/Arid5a/Lipa/Rgs1/Btg1/Pabpc4/Col27a1/Ifi207/Eef1g/Ctsl/Cd200r1/Rpl12/Atp8a1/S1pr1/Litaf/Gnl3	18

## Sheet: Fig 5(P)
ID	Description	GeneRatio	BgRatio	pvalue	p.adjust	qvalue	geneID	Count
GO:0002573	myeloid leukocyte differentiation	33/492	195/13129	2.60709e-13	7.25498e-11	5.11454e-11	Jun/Nfatc1/Tfrc/Mafb/Dcstamp/Trf/Fos/Ocstamp/Cd4/Zfp36l1/Slc9b2/Rassf2/Cebpa/Ccl3/Cd109/Tjp2/App/C1qc/Itgam/Src/Oscar/Vegfa/Pf4/Pirb/Id2/Fasn/Car2/Itgb3/Cebpb/Junb/Tnfsf9/Mitf/Cd300lf	33
GO:0030099	myeloid cell differentiation	45/492	348/13129	2.74952e-13	7.25498e-11	5.11454e-11	Klf2/Jun/Nfatc1/Tfrc/Mafb/Dcstamp/Trf/Fos/Ocstamp/Zfp36/Ptpn11/Cd4/Zfp36l1/Slc9b2/Scin/Rassf2/Gpr171/Cebpa/Ccl3/Cd109/Tjp2/Csf3r/Actn1/App/C1qc/Itgam/Src/Oscar/Irf8/Hif1a/Vegfa/Pf4/Pirb/Id2/Pabpc4/Fasn/Car2/Dab2/Itgb3/Cebpb/Junb/Tnfsf9/Mitf/Sfxn1/Cd300lf	45
GO:0002521	leukocyte differentiation	52/492	472/13129	2.15372e-12	3.72056e-10	2.62288e-10	Jun/Nfatc1/Tfrc/Mafb/Dcstamp/Trf/Fos/Ocstamp/Il4ra/Tmem176a/Cd4/Egr1/Nfkbiz/Zfp36l1/Slc9b2/Tmem176b/Rassf2/Cebpa/Ccl3/Cd109/Tjp2/Fgl2/App/C1qc/Tnfaip3/Gas6/Itgam/Src/Oscar/Vegfa/Pf4/Pirb/Mertk/Id2/Fasn/Prdm1/Car2/Clec4d/Pou2f2/Itgb3/Cebpb/Ptger4/Junb/Vsir/Wwp1/Tnfsf9/Mitf/Cd83/Ptpn22/Cd300lf/Clec4e/Lyl1	52

## Sheet: Fig 5(Q)
ID	Description	GeneRatio	BgRatio	pvalue	p.adjust	qvalue	geneID	Count
GO:0002694	regulation of leukocyte activation	53/492	450/13129	8.85276e-14	2.95848e-11	2.08564e-11	Hmox1/Arg1/Tfrc/Vcam1/Cd38/Il4ra/Cd4/Nfkbiz/Zfp36l1/Fcgr2b/Lamp1/Cd200/Cebpa/Arg2/C1qa/Cd22/Nsd2/Fgl2/Thbs1/Mmp8/Cd84/App/Tnfaip3/Gas6/Itgam/Tlr4/Cd274/Ptafr/Cd300a/Hfe/Slamf7/Mertk/Id2/Hspd1/Tnfrsf1b/C5ar1/Prdm1/Clec4d/Cdkn1a/Igf1/Cebpb/Ctsc/Vsir/Irs2/Ccl2/Cd276/Tnfsf9/Cd83/Tnfsf14/Tnfaip8l2/Ptpn22/Vav3/Cd300lf	53
GO:0002274	myeloid leukocyte activation	29/492	182/13129	3.49048e-11	4.78554e-09	3.37366e-09	Jun/Hmox1/Dcstamp/Tlr8/Il4ra/Tlr7/Cd200/Cebpa/C1qa/Fcgr3/Fcgr4/Thbs1/Mmp8/Cd84/App/Itgam/Tlr4/Ptafr/Pirb/Cd300a/Hspd1/C5ar1/Clec4d/Tlr1/Ctsc/Adam9/Tnfsf9/Ndrg1/Cd300lf	29

## Sheet: Fig 5(R)
ID	Description	GeneRatio	BgRatio	pvalue	p.adjust	qvalue	geneID	Count
GO:0006909	phagocytosis	23/492	180/13129	2.62523e-07	1.13203e-05	7.98044e-06	Fcgr2b/Pld4/Fcgr3/Itgav/Thbs1/Gas6/Tlr4/Cnn2/Irf8/Pecam1/Cd300a/Mertk/C3/Cd36/Itgb3/Ccl2/Abca1/Il2rb/Bin2/P2rx7/Appl2/Cd300lf/Hck	23
GO:0050764	regulation of phagocytosis	14/492	89/13129	5.1759e-06	0.000125798	8.86837e-05	Fcgr2b/Fcgr3/Itgav/Gas6/Cnn2/Cd300a/Mertk/C3/Cd36/Ccl2/Il2rb/Appl2/Cd300lf/Hck	14
GO:0006911	phagocytosis, engulfment	9/492	50/13129	8.61892e-05	0.00139231	0.000981534	Fcgr2b/Fcgr3/Thbs1/Cd300a/C3/Cd36/Abca1/Bin2/Appl2	9
GO:0050765	negative regulation of phagocytosis	4/492	21/13129	0.00701823	0.0411024	0.028976	Fcgr2b/Cnn2/Cd300a/Cd300lf	4

## Sheet: Fig 5(S)
ID	Description	GeneRatio	BgRatio	pvalue	p.adjust	qvalue	geneID	Count
GO:0002224	toll-like receptor signaling pathway	17/492	96/13129	8.67233e-08	4.14026e-06	2.91876e-06	Tlr8/Tlr7/Wdfy1/Unc93b1/Tnfaip3/Tlr4/Cd300a/Cd36/Hspd1/Tlr1/Pik3ap1/Appl2/Arrb2/Rftn1/Ptpn22/Irak3/Cd300lf	17
GO:0034121	regulation of toll-like receptor signaling pathway	11/492	61/13129	1.40096e-05	0.000299638	0.000211236	Wdfy1/Tnfaip3/Cd300a/Cd36/Tlr1/Pik3ap1/Appl2/Arrb2/Ptpn22/Irak3/Cd300lf	11
mmu04620	Toll-like receptor signaling pathway	13/303	86/5724	0.000521551	0.010282	0.00870559	Jun/Ctsk/Fos/Tlr8/Spp1/Tlr7/Ccl4/Ccl3/Map3k8/Ikbke/Tlr4/Map2k3/Tlr1	13

## Sheet: Fig. 5(T)
BubblePlot_ID	ID	Description	GeneRatio	BgRatio	pvalue	p.adjust	qvalue	geneID	Count
Interleukin-6 Production	GO:0032612	interleukin-1 production	17/492	88/13129	2.25163e-08	1.33772e-06	9.43052e-07	Tlr8/Acp5/Egr1/Ccr5/Lpl/Ccl3/Arg2/App/Tnfaip3/Gas6/Tlr4/Cd36/Igf1/Ptger4/Abca1/P2rx7/Arrb2	17
Interleukin-1 Production	GO:0032635	interleukin-6 production	30/492	134/13129	1.3372e-15	1.19167e-12	8.40089e-13	Klf2/Nos2/Tlr8/Ptpn11/Ccr5/Tlr7/Cd200/Arid5a/Lpl/Unc93b1/Mmp8/Cd84/App/Tnfaip3/Cd300ld/Gas6/Tlr4/Ptafr/Cd36/Il1a/Hspd1/Cebpb/Tlr1/Cd200r1/Tnfsf9/Ncl/P2rx7/Arrb2/Ptpn22/Irak3	30
Regulation Of Interleukin-10 Production	GO:0032653	regulation of interleukin-10 production	10/492	44/13129	3.92531e-06	0.000103392	7.28885e-05	Fcgr2b/Tnfrsf9/Mmp8/Cd84/Tlr4/Cd274/Hspd1/Ptger4/Vsir/Cd83	10
Interleukin-10 Production	GO:0032613	interleukin-10 production	10/492	48/13129	9.04351e-06	0.000203175	0.000143232	Fcgr2b/Tnfrsf9/Mmp8/Cd84/Tlr4/Cd274/Hspd1/Ptger4/Vsir/Cd83	10
Positive Regulation Of Interferon-Gamma Production	GO:0032620	interleukin-17 production	6/492	31/13129	0.000889591	0.00913386	0.0064391	Arid5a/Arg2/Tlr4/Osm/Vsir/Rftn1	6
Interleukin-17 Production	GO:0032606	type I interferon production	8/492	81/13129	0.0107797	0.0571883	0.040316	Tlr8/Ptpn11/Tlr7/Mmp12/Tlr4/G3bp1/Hspd1/Ptpn22	8
Type I Interferon Production	GO:0032729	positive regulation of interferon-gamma production	9/492	66/13129	0.000749169	0.007901	0.00556996	Tlr8/Tlr7/Arid5a/Tlr4/Irf8/Hspd1/Cd276/Tnfsf9/Ptpn22	9

## Sheet: Fig. 5(X)
BubblePlot_ID	ID	Description	GeneRatio	BgRatio	pvalue	p.adjust	qvalue	geneID	Count
L-Amino Acid Transmembrane Transporter Activity	GO:0015179	L-amino acid transmembrane transporter activity	7/487	36/13041	0.000315746	0.00896719	0.00748928	Slc1a5/Slc7a1/Slc13a3/Slc7a5/Slc43a2/Slc36a1/Sfxn1	7
Phospholipid Binding	GO:0005543	phospholipid binding	25/487	331/13041	0.000673689	0.0151048	0.0126153	Wdfy1/Apoe/Thbs1/Rufy4/Gas6/Ptafr/Sdcbp/Cd300a/Racgap1/Ap2a2/Psap/Pla2g7/Snx18/Myo1b/Dab2/Arap1/Agap1/Gltp/Pitpnc1/Fgd2/Picalm/Npm1/Bin2/Appl2/Cd300lf	25
Amino Acid Transmembrane Transporter Activity	GO:0015171	amino acid transmembrane transporter activity	7/487	49/13041	0.00213925	0.0327229	0.0273297	Slc1a5/Slc7a1/Slc13a3/Slc7a5/Slc43a2/Slc36a1/Sfxn1	7
Iron Ion Transmembrane Transporter Activity	GO:0005381	iron ion transmembrane transporter activity	3/487	9/13041	0.00367387	0.0481559	0.0402192	Tfrc/Trf/Slc40a1	3
Neutral Amino Acid Transmembrane Transporter Activity	GO:0015175	neutral amino acid transmembrane transporter activity	4/487	20/13041	0.00577999	0.0703508	0.058756	Slc1a5/Slc43a2/Slc36a1/Sfxn1	4
Ferrous Iron Binding	GO:0008198	ferrous iron binding	4/487	21/13041	0.00693269	0.0831923	0.0694811	Trf/Acp5/Ftl1/Fth1	4
Lipid Transport	GO:0006869	lipid transport	27/492	233/13129	1.84662e-07	8.16023e-06	5.75272e-06	Lipg/Nos2/Ptpn11/Spp1/Apoe/Plin2/Itgav/Thbs1/Cd36/Il1a/Eprs/Psap/Osbpl3/Dab2/Osbpl11/Kcnn4/Itgb3/Gltp/Pitpnc1/Irs2/Abcb4/Spns2/Soat1/Abcc3/Atp8a1/Abca1/P2rx7	27
Regulation Of Lipid Transport	GO:0032368	regulation of lipid transport	15/492	82/13129	3.21816e-07	1.3036e-05	9.18998e-06	Lipg/Ptpn11/Spp1/Apoe/Itgav/Thbs1/Il1a/Eprs/Dab2/Itgb3/Irs2/Abcb4/Atp8a1/Abca1/P2rx7	15
Lipid Storage	GO:0019915	lipid storage	11/492	55/13129	4.91264e-06	0.000121611	8.57318e-05	Apoe/Plin2/Lpl/Ikbke/Itgav/C3/Cd36/Osbpl11/Itgb3/Soat1/Enpp1	11
Response To Nutrient Levels	GO:0031667	response to nutrient levels	26/492	277/13129	1.60195e-05	0.000332002	0.000234051	Atf3/Jun/Arsb/Zfp36/Slc2a1/Glul/Adrb2/Spp1/Apoe/Lpl/Mybbp1a/Cad/Gas6/Hfe/P2rx4/Nfe2l2/Cdkn1a/Pim1/Plec/Gdf15/F7/Sirt2/P2rx7/Appl2/Xpr1/Slc8a1	26
Positive Regulation Of Lipid Storage	GO:0010884	positive regulation of lipid storage	5/492	15/13129	0.000159155	0.00229794	0.00161998	Lpl/Ikbke/C3/Cd36/Osbpl11	5
Fatty Acid Transport	GO:0015908	fatty acid transport	9/492	62/13129	0.000468677	0.00553204	0.00389992	Nos2/Apoe/Plin2/Thbs1/Cd36/Il1a/Eprs/Irs2/P2rx7	9
Hexose Transmembrane Transport	GO:0008645	hexose transmembrane transport	10/492	82/13129	0.00094777	0.00943058	0.00664828	Ptpn11/Slc2a1/Rnasel/Fabp5/C3/Nfe2l2/Igf1/Irs2/Enpp1/Appl2	10
Glucose Transmembrane Transport	GO:1904659	glucose transmembrane transport	10/492	82/13129	0.00094777	0.00943058	0.00664828	Ptpn11/Slc2a1/Rnasel/Fabp5/C3/Nfe2l2/Igf1/Irs2/Enpp1/Appl2	10
Regulation Of Glucose Transmembrane Transport	GO:0010827	regulation of glucose transmembrane transport	9/492	69/13129	0.00103885	0.0100784	0.00710496	Ptpn11/Rnasel/Fabp5/C3/Nfe2l2/Igf1/Irs2/Enpp1/Appl2	9
Monosaccharide Transmembrane Transport	GO:0015749	monosaccharide transmembrane transport	10/492	83/13129	0.00104233	0.0100784	0.00710496	Ptpn11/Slc2a1/Rnasel/Fabp5/C3/Nfe2l2/Igf1/Irs2/Enpp1/Appl2	10
Regulation Of Purine Nucleotide Metabolic Process	GO:1900542	regulation of purine nucleotide metabolic process	10/492	83/13129	0.00104233	0.0100784	0.00710496	Nos2/Ier3/Ddit4/Shmt2/Hif1a/Flcn/Entpd1/Igf1/Cdk1/P2rx7	10
Monocarboxylic Acid Transport	GO:0015718	monocarboxylic acid transport	11/492	98/13129	0.00108021	0.0101867	0.00718131	Nos2/Apoe/Plin2/Thbs1/Cd36/Il1a/Eprs/Irs2/Abcb4/Abcc3/P2rx7	11
Carbohydrate Transmembrane Transport	GO:0034219	carbohydrate transmembrane transport	10/492	84/13129	0.00114448	0.0106798	0.00752892	Ptpn11/Slc2a1/Rnasel/Fabp5/C3/Nfe2l2/Igf1/Irs2/Enpp1/Appl2	10
Regulation Of ATP Metabolic Process	GO:1903578	regulation of ATP metabolic process	9/492	75/13129	0.00188918	0.0157814	0.0111254	Ier3/Ddit4/Shmt2/Hif1a/Flcn/Entpd1/Igf1/Cdk1/P2rx7	9
Regulation Of ATP Biosynthetic Process	GO:2001169	regulation of ATP biosynthetic process	7/492	49/13129	0.00218225	0.0177063	0.0124824	Ier3/Ddit4/Hif1a/Flcn/Entpd1/Igf1/P2rx7	7
Amino Acid Transport	GO:0006865	amino acid transport	11/492	107/13129	0.00221083	0.0179111	0.0126268	Arg1/Slc1a5/Arg2/Slc7a1/Slc13a3/Slc7a5/Rgs2/Slc43a2/Slc36a1/P2rx7/Sfxn1	11
Regulation Of Glucose Import	GO:0046324	regulation of glucose import	7/492	53/13129	0.00344412	0.0248525	0.0175203	Ptpn11/Rnasel/Nfe2l2/Igf1/Irs2/Enpp1/Appl2	7
Arginine Catabolic Process	GO:0006527	arginine catabolic process	3/492	10/13129	0.0051543	0.0328096	0.0231297	Arg1/Nos2/Arg2	3
Arginine Transport	GO:0015809	arginine transport	3/492	10/13129	0.0051543	0.0328096	0.0231297	Arg1/Arg2/Slc7a1	3
Positive Regulation Of Glucose Import	GO:0046326	positive regulation of glucose import	5/492	31/13129	0.00549186	0.034466	0.0242975	Ptpn11/Rnasel/Nfe2l2/Igf1/Irs2	5
Regulation Of Glycogen Biosynthetic Process	GO:0005979	regulation of glycogen biosynthetic process	4/492	24/13129	0.0114056	0.0592095	0.0417409	Ppp1r3b/Igf1/Irs2/Enpp1	4
Positive Regulation Of Cholesterol Storage	GO:0010886	positive regulation of cholesterol storage	2/492	6/13129	0.0190169	0.0800027	0.0563995	Lpl/Cd36	2
Cholesterol Metabolism	mmu04979	Cholesterol metabolism	8/303	35/5724	0.000376924	0.00806844	0.00683141	Lipg/Apoe/Lpl/Lipa/Nceh1/Cd36/Soat1/Abca1	8

## Sheet: Fig. S8-A
ID	Description	GeneRatio	BgRatio	pvalue	p.adjust	qvalue	geneID	Count
GO:0005125	cytokine activity	18/487	115/13041	2.42043e-07	5.15552e-05	4.30582e-05	Ppbp/Cxcl3/Spp1/Ccl6/Ccl4/Cxcl2/Ccl3/Ccl8/Vegfa/Pf4/Areg/Il1a/Osm/Ccl7/Gdf15/Ccl2/Tnfsf9/Tnfsf14	18
GO:0004896	cytokine receptor activity	11/487	76/13041	0.00011207	0.00477418	0.00398734	Cxcr4/Il4ra/Cd4/Ccr5/Csf2rb2/Csf3r/Il21r/Ccrl2/Il2rb/Csf2rb/Il10ra	11
GO:0050663	cytokine secretion	37/492	202/13129	6.35244e-16	1.04612e-12	7.3748e-13	Nos2/Tlr8/Il4ra/Ccr5/Cd200/Arid5a/Lpl/Ccl3/Arg2/Clec4n/Itgav/Unc93b1/Tnfrsf9/Mmp8/Cd84/Mmp12/Tnfaip3/Gas6/Src/Tlr4/Cd274/Cd36/Il1a/Hspd1/Tnfrsf1b/Osm/Cd300c2/Srgn/Tlr1/Ptger4/Cd200r1/Cd276/Abca1/Ncl/P2rx7/Ptpn22/Clec4e	37
GO:0050707	regulation of cytokine secretion	34/492	176/13129	1.88854e-15	1.44257e-12	1.01697e-12	Tlr8/Il4ra/Ccr5/Cd200/Arid5a/Lpl/Ccl3/Arg2/Clec4n/Unc93b1/Tnfrsf9/Mmp8/Cd84/Mmp12/Tnfaip3/Gas6/Src/Tlr4/Cd274/Cd36/Il1a/Hspd1/Tnfrsf1b/Osm/Cd300c2/Srgn/Tlr1/Ptger4/Cd200r1/Cd276/Ncl/P2rx7/Ptpn22/Clec4e	34
GO:0019221	cytokine-mediated signaling pathway	31/492	268/13129	2.34798e-08	1.36464e-06	9.62027e-07	Arg1/Cxcr4/Ppbp/Cd4/Egr1/Cxcl3/Klf6/Csf2rb2/Ccl6/Ccl4/Cxcl2/Cebpa/Ccl3/Tjp2/Ccl8/Ikbke/Padi2/Mmp12/Gas6/Pf4/Pirb/Il1a/Osm/Ccl7/Ccl2/Il2rb/Csf2rb/Appl2/Il10ra/Irak3/Cd300lf	31
GO:0042089	cytokine biosynthetic process	15/492	100/13129	4.39941e-06	0.000112553	7.93466e-05	Tlr8/Zfp36/Egr1/Tlr7/Fcgr3/Thbs1/App/Tlr4/Klf4/Ptafr/Il1a/Map2k3/Cebpb/Tlr1/Cd276	15

## Sheet: Fig. S8-B
ID	Description	GeneRatio	BgRatio	pvalue	p.adjust	qvalue	geneID	Count
GO:0008009	chemokine activity	10/487	30/13041	7.3746e-08	3.14158e-05	2.6238e-05	Ppbp/Cxcl3/Ccl6/Ccl4/Cxcl2/Ccl3/Ccl8/Pf4/Ccl7/Ccl2	10
GO:0042379	chemokine receptor binding	11/487	39/13041	1.1428e-07	3.24555e-05	2.71064e-05	Ppbp/Cxcl3/Ccl6/Ccl4/Cxcl2/Ccl3/Ccl8/Ccrl2/Pf4/Ccl7/Ccl2	11
GO:0070098	chemokine-mediated signaling pathway	12/492	43/13129	3.56835e-08	1.967e-06	1.38668e-06	Cxcr4/Ppbp/Cxcl3/Ccl6/Ccl4/Cxcl2/Ccl3/Ccl8/Padi2/Pf4/Ccl7/Ccl2	12

## Sheet: Fig. S8-C
ID	Description	GeneRatio	BgRatio	pvalue	p.adjust	qvalue	geneID	Count
GO:0019882	antigen processing and presentation	10/492	83/13129	0.00104233	0.0100784	0.00710496	Fcgr2b/March1/Fcgr3/Fgl2/Unc93b1/Thbs1/Hfe/Kdm5d/Ctss/Rftn1	10
GO:0002577	regulation of antigen processing and presentation	3/492	17/13129	0.0240447	0.0952348	0.0671377	Fgl2/Thbs1/Hfe	3
REACTOME_MHC_CLASS_II_ANTIGEN_PRESENTATION	REACTOME_MHC_CLASS_II_ANTIGEN_PRESENTATION	14/501	105/13392	3.53634e-05	0.000457096	0.000296539	Ctsk/Ctsb/Ctsd/Ap1b1/Lgmn/Ctsh/Kif11/Racgap1/Ap2a2/Ctsl/Ctsc/Ctss/Kif15/Kif3b	14
GO_ANTIGEN_PROCESSING_AND_PRESENTATION_OF_PEPTIDE_ANTIGEN_VIA_MHC_CLASS_II	GO_ANTIGEN_PROCESSING_AND_PRESENTATION_OF_PEPTIDE_ANTIGEN_VIA_MHC_CLASS_II	13/481	105/12316	0.000219288	0.00391955	0.00298442	Ctsk/Ctsd/March1/Ap1b1/Lgmn/Kif11/Racgap1/Ap2a2/Cenpe/Ctsl/Ctss/Kif15/Kif3b	13
GO_ANTIGEN_PROCESSING_AND_PRESENTATION	GO_ANTIGEN_PROCESSING_AND_PRESENTATION	22/481	251/12316	0.000341137	0.00541525	0.00412327	Ctsk/Ctsd/March1/Ap1b1/Lgmn/Itgav/Ctsh/Kif11/Hfe/Cd36/Racgap1/Ap2a2/Cenpe/Fcgrt/Itgb3/Ctsl/Kdm5d/Abcb4/Ctss/Kif15/Rftn1/Kif3b	22

[truncated: 3 more sheets: Fig. S8-D, Fig. S8-E, Fig. S8-F]
